# Supplementary material for: A single chemosensor for bimetal Cu(ii) and Zn(ii) in aqueous medium
Source: Royal Society of Chemistry journal article supplement (doi:10.1039/c6ra01030j), 2016-01-01
Supplement: c6ra01030j1.pdf [file c6ra01030j1.pdf]

## Supporting Information

### A Single Chemosensor for Bimetal Cu(II) and Zn(II) in Aqueous Medium

ZhuangLiao<sup>a</sup>, Dan Wang<sup>a</sup>, Jian-Quang Zheng<sup>b</sup>, Hong-Wei Tan<sup>a</sup>, and Lin-Pei Jin<sup>a</sup>, Xiang-Jun Zheng<sup>a\*</sup>

a. Beijing Key Laboratory of Energy Conversion and Storage Materials, College of Chemistry, Beijing Normal University, Beijing, 100875, People's Republic of China

b. Beijing Key Laboratory of Bioactive Substances and Functional Foods, Beijing Union University, Beijing, 100191, People's Republic of China

Email: xjzheng@bnu.edu.cn

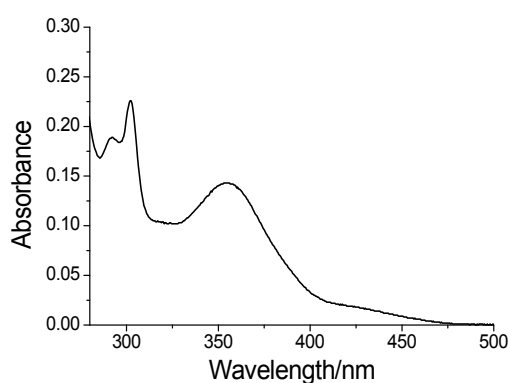

Figure S1 UV-Vis spectrum of HL (10  $\mu$ M) in DMSO/H<sub>2</sub>O (1/1, v/v).

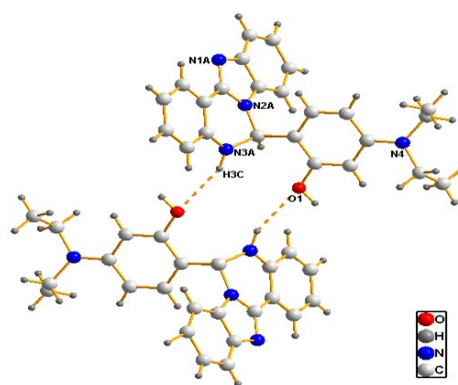

Figure S2 The intermolecular hydrogen bonds in HL.

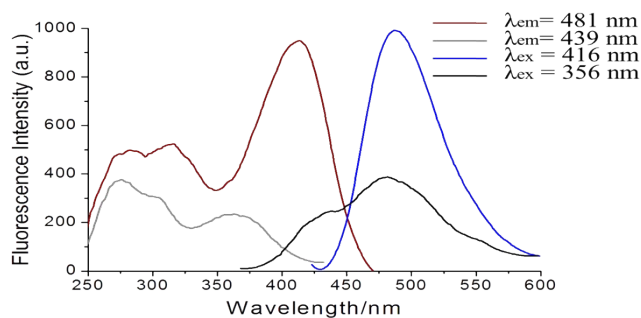

**Figure S3** The excitation and fluorescence spectra of HL (10  $\mu\text{M}$ ) + 1 equiv. Zn (II) in DMSO/H<sub>2</sub>O (v/v, 1:1).

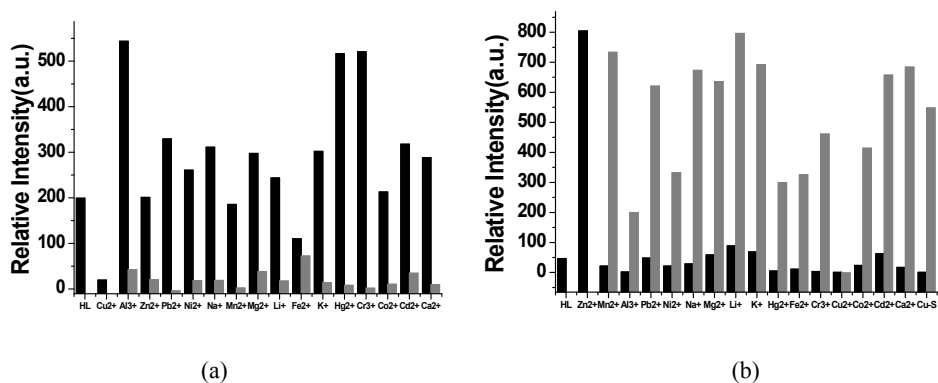

**Figure S4** (a) Relative fluorescence intensity of 10  $\mu\text{M}$  HL with 1 equiv.  $\text{Cu}^{2+}$  in the presence of 1 equiv. Other metal ions in DMSO/H<sub>2</sub>O (1/1, v/v), in the absence (black) and presence (gray) of  $\text{Cu}^{2+}$ ,  $\lambda_{\text{ex}} = 356 \text{ nm}$ ; (b) relative fluorescence intensity of HL with 1 equiv.  $\text{Zn}^{2+}$  in the presence of other metal ions (1 equiv.) in DMSO/H<sub>2</sub>O (1/1, v/v), in the absence (black) and presence (gray) of  $\text{Zn}^{2+}$ ,  $\lambda_{\text{ex}} = 416 \text{ nm}$ .

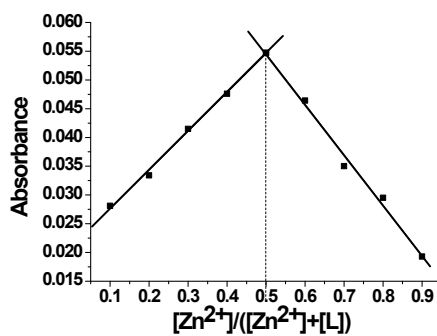

**Figure S5** Job plot for the determination of the stoichiometry in the complexation of HL with  $\text{Zn}^{2+}$  in DMSO/H<sub>2</sub>O (v/v, 1/1), absorbance at 416 nm was plotted as a function of the molar ratio  $[\text{Zn}^{2+}]/([\text{Zn}^{2+}]+[\text{HL}])$ .

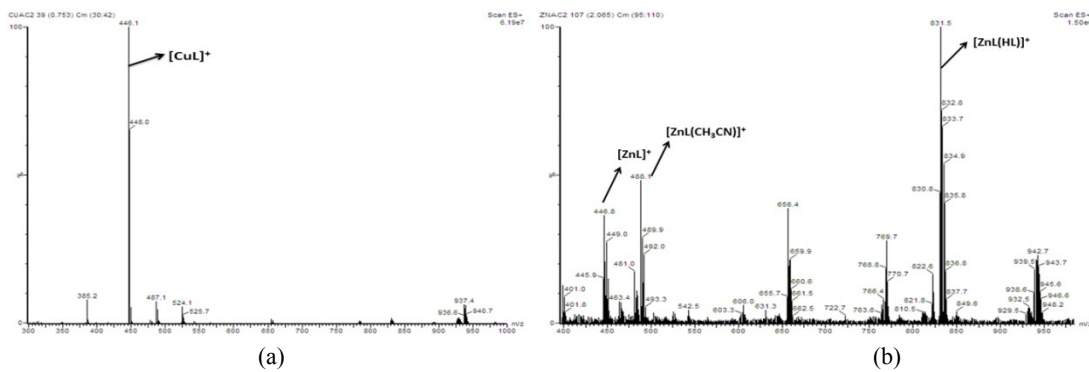

**Figure S6** Positive-ion electrospray ionization mass spectra of HL upon addition of  $\text{CuCl}_2$  (a) and  $\text{Zn}(\text{Ac})_2$  (b).

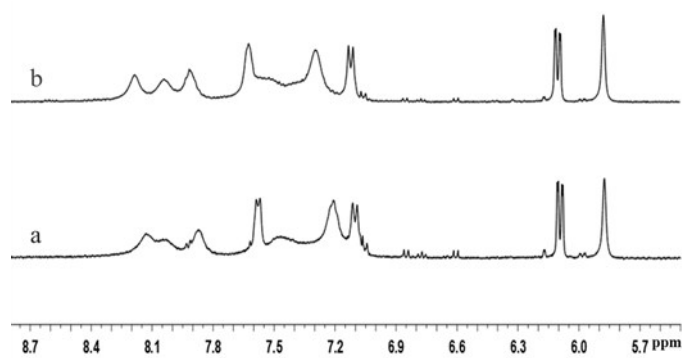

**Figure S7**  $^1\text{H}$  NMR spectra in  $\text{DMSO-d}_6$ : (a) HL+1.0 equiv.  $\text{Zn}^{2+}$ , (b) 2.

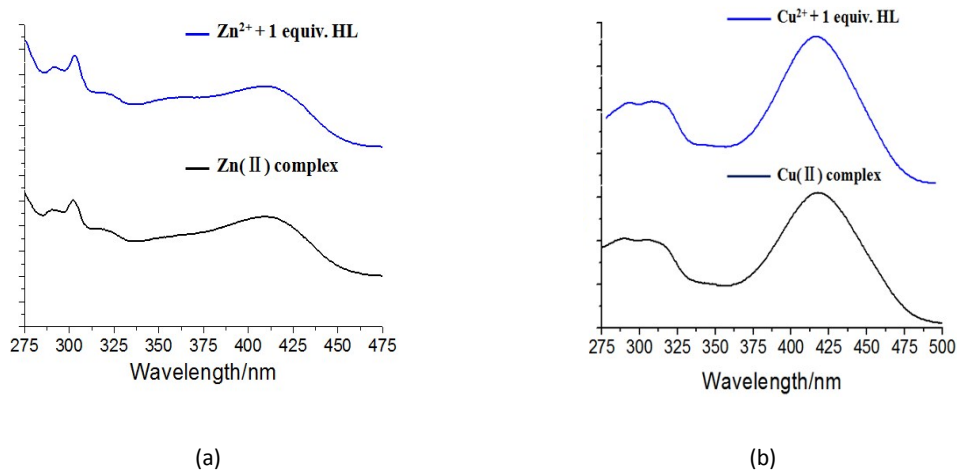

**Figure S8** (a) UV-Vis spectra of  $\text{Zn}(\text{II})$  complex and HL (10  $\mu\text{M}$ ) + 1 equiv.  $\text{Zn}(\text{II})$ , (b) UV-Vis spectra of  $\text{Cu}(\text{II})$  complex and HL (10  $\mu\text{M}$ ) + 1 equiv.  $\text{Cu}(\text{II})$  (The solvents for a and b were  $\text{DMSO}/\text{H}_2\text{O}$  (1/1, v/v)).

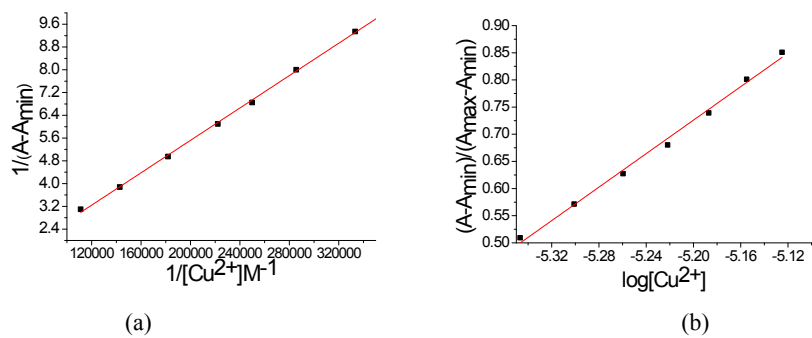

**Figure S9** (a) Benesi-Hildebrand plot of HL and  $\text{Cu}^{2+}$  in DMSO/ $\text{H}_2\text{O}$  (v/v, 1/1), (b) Normalized response of UV absorbances at 418 nm to changing  $\text{Cu}^{2+}$  concentrations.

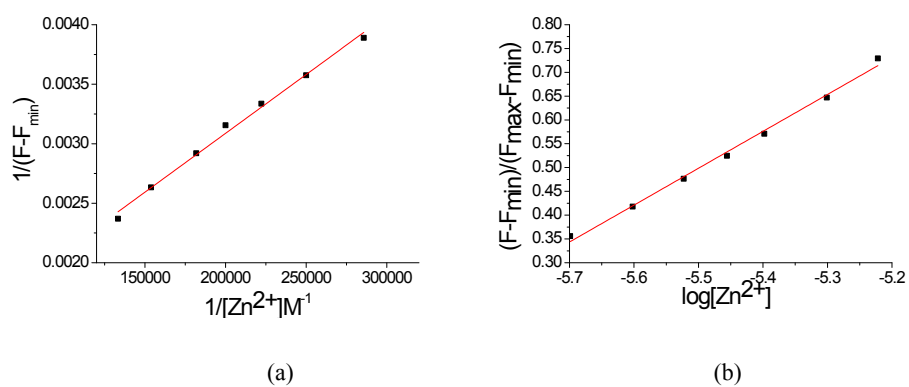

**Figure S10** (a) Benesi-Hildebrand plot of HL and  $\text{Zinc}^{2+}$  in DMSO/ $\text{H}_2\text{O}$  (v/v, 1:1), (b) Normalized response of fluorescence signals at 481 nm to changing  $\text{Zn}^{2+}$  concentrations.

**Table S1 Bond Distances (Å) and Angles (deg) for HL.**

|                     |           |                     |           |
|---------------------|-----------|---------------------|-----------|
| O(1)-C(20)          | 1.368(3)  | C(15)-C(14B)        | 1.512(3)  |
| N(1A)-C(7A)         | 1.351(9)  | C(16)-C(17)         | 1.369(4)  |
| N(1A)-C(1A)         | 1.377(6)  | C(17)-C(18)         | 1.407(4)  |
| N(2A)-C(6A)         | 1.348(6)  | C(18)-C(19)         | 1.397(4)  |
| N(2A)-C(7A)         | 1.350(11) | C(19)-C(20)         | 1.382(4)  |
| N(2A)-C(14A)        | 1.467(5)  | C(21)-C(22)         | 1.426(6)  |
| N(3A)-C(13A)        | 1.399(5)  | C(23)-C(24)         | 1.459(5)  |
| N(3A)-C(14A)        | 1.478(5)  | N(1B)-C(7B)         | 1.25(2)   |
| N(4)-C(18)          | 1.375 (4) | N(1B)-C(1B)         | 1.429(13) |
| N(4)-C(21)          | 1.479(5)  | N(2B)-C(6B)         | 1.372(12) |
| N(4)-C(23)          | 1.484(4)  | N(2B)-C(7B)         | 1.39(2)   |
| C(1A)-C(2A)         | 1.3900    | N(2B)-C(14B)        | 1.429(7)  |
| C(1A)-C(6A)         | 1.3900    | N(3B)-C(13B)        | 1.398(10) |
| C(2A)-C(3A)         | 1.3900    | N(3B)-C(14B)        | 1.477(7)  |
| C(3A)-C(4A)         | 1.3900    | C(1B)-C(2B)         | 1.3900    |
| C(4A)-C(5A)         | 1.3900    | C(1B)-C(6B)         | 1.3900    |
| C(5A)-C(6A)         | 1.3900    | C(2B)-C(3B)         | 1.3900    |
| C(7A)-C(8A)         | 1.423(8)  | C(3B)-C(4B)         | 1.3900    |
| C(8A)-C(9A)         | 1.3900    | C(4B)-C(5B)         | 1.3900    |
| C(8A)-C(13A)        | 1.3900    | C(5B)-C(6B)         | 1.3900    |
| C(9A)-C(10A)        | 1.3900    | C(7B)-C(8B)         | 1.429(17) |
| C(10A)-C(11A)       | 1.3900    | C(8B)-C(9B)         | 1.3900    |
| C(11A)-C(12A)       | 1.3900    | C(8B)-C(13B)        | 1.3900    |
| C(12A)-C(13A)       | 1.3900    | C(9B)-C(10B)        | 1.3900    |
| C(14A)-C(15)        | 1.504(5)  | C(10B)-C(11B)       | 1.3900    |
| C(15)-C(16)         | 1.386(4)  | C(11B)-C(12B)       | 1.3900    |
| C(15)-C(20)         | 1.392(3)  | C(12B)-C(13B)       | 1.3900    |
| C(7A)-N(1A)-C(1A)   | 104.5(6)  | C(16)-C(17)-C(18)   | 120.5(3)  |
| C(6A)-N(2A)-C(7A)   | 108.1(5)  | N(4)-C(18)-C(19)    | 120.5(3)  |
| C(6A)-N(2A)-C(14A)  | 127.6(5)  | N(4)-C(18)-C(17)    | 122.7(3)  |
| C(7A)-N(2A)-C(14A)  | 123.5(5)  | C(19)-C(18)-C(17)   | 116.8(3)  |
| C(13A)-N(3A)-C(14A) | 121.2(4)  | C(20)-C(19)-C(18)   | 121.5(3)  |
| C(18)-N(4)-C(21)    | 122.4(3)  | O(1)-C(20)-C(19)    | 121.0(2)  |
| C(18)-N(4)-C(23)    | 120.9(3)  | O(1)-C(20)-C(15)    | 117.3(2)  |
| C(21)-N(4)-C(23)    | 116.4(3)  | C(19)-C(20)-C(15)   | 121.7(2)  |
| N(1A)-C(1A)-C(2A)   | 130.3(5)  | C(22)-C(21)-N(4)    | 110.7(4)  |
| N(1A)-C(1A)-C(6A)   | 109.6(5)  | C(24)-C(23)-N(4)    | 112.8(4)  |
| C(2A)-C(1A)-C(6A)   | 120.0     | C(7B)-N(1B)-C(1B)   | 104.1(12) |
| C(1A)-C(2A)-C(3A)   | 120.0     | C(6B)-N(2B)-C(7B)   | 106.7(12) |
| C(4A)-C(3A)-C(2A)   | 120.0     | C(6B)-N(2B)-C(14B)  | 122.8(9)  |
| C(3A)-C(4A)-C(5A)   | 120.0     | C(7B)-N(2B)-C(14B)  | 130.4(12) |
| C(6A)-C(5A)-C(4A)   | 120.0     | C(13B)-N(3B)-C(14B) | 119.9(7)  |

|                      |          |                      |           |
|----------------------|----------|----------------------|-----------|
| N(2A)-C(6A)-C(5A)    | 133.6(5) | C(2B)-C(1B)-C(6B)    | 120.0     |
| N(2A)-C(6A)-C(1A)    | 106.3(5) | C(2B)-C(1B)-N(1B)    | 130.0(12) |
| C(5A)-C(6A)-C(1A)    | 120.0    | C(6B)-C(1B)-N(1B)    | 109.9(12) |
| N(2A)-C(7A)-N(1A)    | 111.4(7) | C(1B)-C(2B)-C(3B)    | 120.0     |
| N(2A)-C(7A)-C(8A)    | 120.4(7) | C(4B)-C(3B)-C(2B)    | 120.0     |
| N(1A)-C(7A)-C(8A)    | 128.2(8) | C(3B)-C(4B)-C(5B)    | 120.0     |
| C(9A)-C(8A)-C(13A)   | 120.0    | C(6B)-C(5B)-C(4B)    | 120.0     |
| C(9A)-C(8A)-C(7A)    | 121.9(7) | N(2B)-C(6B)-C(5B)    | 135.5(12) |
| C(13A)-C(8A)-C(7A)   | 118.0(7) | N(2B)-C(6B)-C(1B)    | 104.5(12) |
| C(8A)-C(9A)-C(10A)   | 120.0    | C(5B)-C(6B)-C(1B)    | 120.0     |
| C(9A)-C(10A)-C(11A)  | 120.0    | N(1B)-C(7B)-N(2B)    | 114.6(15) |
| C(10A)-C(11A)-C(12A) | 120.0    | N(1B)-C(7B)-C(8B)    | 130.6(18) |
| C(13A)-C(12A)-C(11A) | 120.0    | N(2B)-C(7B)-C(8B)    | 114.5(18) |
| C(12A)-C(13A)-C(8A)  | 120.0    | C(9B)-C(8B)-C(13B)   | 120.0     |
| C(12A)-C(13A)-N(3A)  | 121.8(6) | C(9B)-C(8B)-C(7B)    | 120.8(14) |
| C(8A)-C(13A)-N(3A)   | 118.1(6) | C(13B)-C(8B)-C(7B)   | 119.1(14) |
| N(2A)-C(14A)-N(3A)   | 105.5(3) | C(10B)-C(9B)-C(8B)   | 120.0     |
| N(2A)-C(14A)-C(15)   | 113.8(3) | C(9B)-C(10B)-C(11B)  | 120.0     |
| N(3A)-C(14A)-C(15)   | 113.6(3) | C(12B)-C(11B)-C(10B) | 120.0     |
| C(16)-C(15)-C(20)    | 116.3(2) | C(11B)-C(12B)-C(13B) | 120.0     |
| C(16)-C(15)-C(14A)   | 124.9(2) | C(12B)-C(13B)-C(8B)  | 120.0     |
| C(20)-C(15)-C(14A)   | 118.3(2) | C(12B)-C(13B)-N(3B)  | 118.8(11) |
| C(16)-C(15)-C(14B)   | 125.4(2) | C(8B)-C(13B)-N(3B)   | 121.2(11) |
| C(20)-C(15)-C(14B)   | 118.3(2) | N(2B)-C(14B)-N(3B)   | 106.0(5)  |
| C(14A)-C(15)-C(14B)  | 0.53(16) | N(2B)-C(14B)-C(15)   | 111.2(3)  |
| C(17)-C(16)-C(15)    | 123.2(3) | N(3B)-C(14B)-C(15)   | 107.0(3)  |

**Table S2 Selected Bond Distances (Å) and Angles (deg) for 1.**

|                   |            |                   |            |
|-------------------|------------|-------------------|------------|
| Cu(1)-Cl(1)       | 2.2752(13) | Cu(1)-N(2A)       | 1.984(3)   |
| Cu(1)-O(1)        | 1.927(3)   | Cu(1)-N(3A)       | 1.962(3)   |
| O(1)-Cu(1)-N(3A)  | 93.44(14)  | O(1)-Cu(1)-Cl(1)  | 90.94(10)  |
| O(1)-Cu(1)-N(2A)  | 141.91(14) | N(3A)-Cu(1)-Cl(1) | 164.35(11) |
| N(3A)-Cu(1)-N(2A) | 88.33(13)  | N(2A)-Cu(1)-Cl(1) | 97.43(10)  |

**Table S3 Selected Bond Distances (Å) and Angles (deg) for 2**

|                   |           |                   |           |
|-------------------|-----------|-------------------|-----------|
| O(4)-Zn(1)        | 1.915(11) | O(1)-Zn(2)        | 1.956(11) |
| O(5)-Zn(1)        | 2.295(12) | O(2)-Zn(2)        | 2.336(10) |
| O(6)-Zn(1)        | 2.031(11) | O(3)-Zn(2)        | 2.009(12) |
| N(2B)-Zn(1)       | 1.920(12) | N(2A)-Zn(2)       | 2.065(10) |
| N(3B)-Zn(1)       | 2.028(12) | N(3A)-Zn(2)       | 2.065(12) |
| O(4)-Zn(1)-N(2B)  | 127.8(5)  | O(1)-Zn(2)-O(3)   | 110.6(5)  |
| O(4)-Zn(1)-N(3B)  | 94.2(5)   | O(1)-Zn(2)-N(2A)  | 128.6(5)  |
| N(2B)-Zn(1)-N(3B) | 90.5(4)   | O(3)-Zn(2)-N(2A)  | 115.5(5)  |
| O(4)-Zn(1)-O(6)   | 116.5(5)  | O(1)-Zn(2)-N(3A)  | 95.2(5)   |
| N(2B)-Zn(1)-O(6)  | 111.5(5)  | O(3)-Zn(2)-N(3A)  | 109.6(5)  |
| N(3B)-Zn(1)-O(6)  | 107.0(5)  | N(2A)-Zn(2)-N(3A) | 89.8(5)   |
| O(4)-Zn(1)-O(5)   | 88.6(4)   | O(1)-Zn(2)-O(2)   | 88.7(4)   |
| N(2B)-Zn(1)-O(5)  | 95.9(5)   | O(3)-Zn(2)-O(2)   | 57.0(5)   |
| N(3B)-Zn(1)-O(5)  | 169.4(5)  | N(2A)-Zn(2)-O(2)  | 97.9(4)   |
| O(6)-Zn(1)-O(5)   | 62.8(5)   | N(3A)-Zn(2)-O(2)  | 166.5(5)  |
